# Physical Activity, Smoking, and Alcohol Consumption in Association with Incidence of Type 2 Diabetes among Middle-Aged and Elderly Chinese Men

Liang Shi<sup>1,2</sup>, Xiao-Ou Shu<sup>1</sup>, Honglan Li<sup>3</sup>, Hui Cai<sup>1</sup>, Qiaolan Liu<sup>1,4</sup>, Wei Zheng<sup>1</sup>, Yong-Bing Xiang<sup>3</sup>, Raquel Villegas<sup>5\*</sup>

**1** Department of Medicine, Division of Epidemiology and Vanderbilt Epidemiology Center, Vanderbilt University Medical Center, Nashville, Tennessee, United States of America, **2** Department of Diabetes Control and Prevention, Shanghai Municipal Center for Disease Control and Prevention, Shanghai, People's Republic of China, **3** Department of Epidemiology, Shanghai Cancer Institute, Shanghai, People's Republic of China, **4** Huaxi School of Public Health, Sichuan University, Chengdu, People's Republic of China, **5** Department of Medicine, Division of Diabetes, Endocrinology and Metabolism and Vanderbilt Epidemiology Center, Vanderbilt University Medical Center, Tennessee, United States of America

## Abstract

**Background:** Type 2 diabetes mellitus (T2DM) is a prevalent chronic disease worldwide. The prevalence of T2DM is increasing rapidly in China. Understanding the contribution of modifiable lifestyle factors on T2DM risk is imperative to prevent the development of T2DM in China.

**Methods:** We examined associations between lifestyle factors including physical activity, smoking and alcohol consumption with incidence of T2DM among middle-aged and elderly men in urban Shanghai. Information on socio-demographics, lifestyle habits, dietary habits, and disease history was collected via in-person interviews. Anthropometric measurements were taken. A total of 51 464 Chinese men aged 40–74 years free of T2DM, coronary heart disease (CHD), and stroke at baseline were included in the current study. Incident T2DM was identified through follow-up surveys conducted every 2–3 years. Cox proportional hazard analyses were conducted to evaluate associations between lifestyle risk factors and incidence of T2DM.

**Results:** We documented 1304 new cases of T2DM during 276 929 person-years of follow-up (average: 5.4 years). Physical activity was inversely associated with T2DM risk. Daily living, commuting, and total physical activity METs had inverse negative dose-response relationships with T2DM ( $P$ -trend = 0.0033, 0.0022, and  $<0.0001$ , respectively). Regular participation in exercise or sports reduced T2DM risk (HR = 0.86, 95%CI: 0.76–0.98). Moderate alcohol intake (1–3 drinks/day) was inversely related to T2DM risk (HR = 0.80, 95%CI: 0.67–0.94). Cigarette smoking, on the other hand, was associated with increased T2DM risk; HRs were 1.25 (95%CI: 1.00–1.56) for smoking more than 20 cigarettes per day and 1.28 (95%CI: 1.04–1.57) for smoking more than 40 pack-years.

**Conclusions:** Physical activity and moderate alcohol intake are inversely associated with T2DM risk, whereas smoking was positively associated with T2DM risk among middle-age and elderly Chinese men. Preventive measures should be developed to focus on these modifiable lifestyle habits to reduce the upward trend of T2DM.

**Citation:** Shi L, Shu X-O, Li H, Cai H, Liu Q, et al. (2013) Physical Activity, Smoking, and Alcohol Consumption in Association with Incidence of Type 2 Diabetes among Middle-Aged and Elderly Chinese Men. PLoS ONE 8(11): e77919. doi:10.1371/journal.pone.0077919

**Editor:** Jerson Laks, Federal University of Rio de Janeiro, Brazil

**Received:** June 14, 2013; **Accepted:** September 13, 2013; **Published:** November 4, 2013

**Copyright:** © 2013 Shi et al. This is an open-access article distributed under the terms of the Creative Commons Attribution License, which permits unrestricted use, distribution, and reproduction in any medium, provided the original author and source are credited.

**Funding:** This study was supported by US PHS grant number R01 CA082729 (to Xiao-Ou Shu) from the National Cancer Institute. The work of Liang Shi was supported by a grant from the Fogarty International Institute (D43 TX008313 to Xiao-Ou Shu). The funders had no role in study design, data collection and analysis, decision to publish, or preparation of the manuscript.

**Competing Interests:** The authors have declared that no competing interests exist.

\* E-mail: raquel.villegas@vanderbilt.edu

## Introduction

Type 2 diabetes mellitus (T2DM) has become one of the most prevalent chronic diseases worldwide [1–3]. The prevalence of T2DM is increasing rapidly not only in developed countries but also in developing countries [4]. According to the China National Diabetes and Metabolic Disorders Study, in 2008, there were 92.4 million adults living with diabetes in China [5]. There is a need for effective strategies aimed at the primary prevention of this disease.

The importance of lifestyle factors in the etiology of T2DM has been well documented in Western populations [6]. However, limited data are available on the associations between lifestyle risk factors and T2DM in non-Western countries, including China. As the world's largest developing country, China has encountered enormous economic development in the past several decades, especially in large cities such as Shanghai. Many Chinese are facing a rapid transition to a more Westernized lifestyle. Understanding the contribution of lifestyle factors to T2DM risk is imperative to prevent the development of T2DM in China.

In 2002, we launched a large, population-based cohort study of men in Shanghai, China, the Shanghai Men's Health Study (SMHS), with the main focus of investigating the impact of diet and other lifestyle factors on the risk of chronic diseases. In this population, the prevalence of smoking is high (65.27%) and the types of alcoholic beverages consumed differ substantially from Western populations [7]. We evaluated whether lifestyle factors associated with T2DM in Western countries are similarly related to the incidence of T2DM among Chinese men.

## Methods

### Study Population

The SMHS is an ongoing, population-based, prospective cohort study of 61 491 middle-aged and elderly men living in urban Shanghai. Study recruitment was conducted from April 2002 to June 2006. Description of the study design and baseline questionnaires have been previously published elsewhere [8,9]. Briefly, a total of 61,491 men (response rate = 74.0%) aged 40–74 years living in 8 urban communities of Shanghai with no history of cancer at recruitment were enrolled. In-person interviews were conducted by trained interviewers (retired nurses or physicians), and information on socio-demographic characteristics, lifestyle factors (including physical activity, smoking habits, and alcohol consumption), dietary habits, and medical history was collected. Anthropometric measurements including weight, height, and circumferences of the waist and hips were taken according to a standard protocol at baseline. The Institutional Review Boards of Vanderbilt University Medical Center and the Shanghai Cancer Institute approved the study protocols. All participants provided written informed consent.

### Physical Activity Assessment

At baseline recruitment, information on physical activity was obtained using a validated physical activity questionnaire (PAQ) [10]. The questionnaire evaluated physical activity during the 5 years preceding the interview and covered physical activity related to leisure time activities (LPA), daily living activities (DPA), and commuting to/from work (CPA). For LPA, participants were asked whether they had engaged in regular exercise or sports (at least once a week for 3 months continuously) over the preceding 5 years. Exercisers were asked to report details for up to three types of exercise/sports (i.e., type, hours/week, and years of participation in each activity). For DPA, participants were asked about participation in daily activities (i.e., walking, stair climbing, bicycling, and household activities) and, for CPA transportation (i.e., walking and cycling to/from work, daily errands).

Energy expenditure in standard metabolic equivalent values (METs) was used to estimate the intensity of different types of physical activity [11]. Exercise/sports-related energy expenditure was estimated by the weighted average of energy expended in all activities reported during the 5 years preceding the interview (METs hours/week/year). Individual non-exercise-related activities were estimated using the following standard METs: housework, 2.0 METs; walking, 3.3 METs; stair climbing, 9.0 METs; and bicycling, 4.0 METs [11]. We calculated total physical activity (total METs) by combining energy expenditure from all types of physical activity (LPA, DPA, and CPA).

### Cigarette Smoking Assessment

Participants were asked whether they had ever smoked at least one cigarette per day for more than 6 months. For men who answered yes to this question, a detailed smoking history was taken, which included age when they started smoking, age when

they stopped (for those who quit), and for current smokers, the number of cigarettes smoked per day. Pack-years (packs smoked per day multiplied by years of smoking) were calculated to estimate lifetime exposure to cigarette smoking.

### Alcohol Consumption Assessment

Participants who reported consuming alcohol on a regular basis (at least once per week) for more than 6 months were defined as drinkers and were asked for the age at which they started and stopped regular drinking. Current drinkers were also asked to provide information about the types, frequencies, and usual quantity of their alcohol intake (rice wine, grape wine, beer, and liquor separately). One unit of alcohol (1 drink) was defined as one 4-ounce glass of wine, one 12-ounce can of beer, or one ounce of liquor [12]. Total alcohol consumption was calculated by adding units of intake for all alcoholic beverages. We then classified participants as follows: non-drinkers, occasional or light drinkers (<1 drink/day), moderate drinkers (1.0–2.99 drinks/day), and heavy drinkers ( $\geq 3$  drinks/day). We also examined associations between different alcoholic beverages and T2DM. Grape wine consumption was uncommon in this population and was combined with rice wine in the analyses.

### Dietary and other Exposure Assessments

Information on dietary intake was evaluated by a validated food frequency questionnaire [13] and total energy intake was estimated. Socio-demographic factors such as age, occupation (professional, clerical, manual), level of education (none/elementary school, middle school, high school, college), per capita monthly income (<500, 500–999, 1,000–1,999, >1,999 *yuan*), history of hypertension, and family history of diabetes were assessed at baseline and considered to be potential confounders in the analyses.

### Outcome Ascertainment

Every 2–3 years, in-person, follow-up surveys were conducted to record the occurrence of cancer and other chronic diseases, including T2DM, in the cohort. To date, two in-person surveys (2004 to 2008, 2008 to 2011) have been completed, with response rates of 97.7% and 91.9%, respectively. Participants were asked if they had been diagnosed with diabetes by a physician. Those who reported having T2DM were also asked about their blood glucose levels. We considered a case of T2DM to be “confirmed” if the participant's reported glucose level met at least one of the American Diabetes Association (ADA) recommended T2DM blood glucose criteria: 1) fasting glucose level greater than or equal to 7 mmol/l on at least two separate occasions, 2) an oral glucose tolerance test (OGTT) performed in their doctor's office with a value greater than or equal to 11.1 mmol/L, and/or 3) use of hypoglycemic medication (i.e., insulin or oral hypoglycemic drugs) (10). Other cases were considered to be “probable” cases. We performed analyses with all self-reported T2DM cases included, but after excluding the “probable” cases, we found similar trends. In this report, we present results that include all cases of self-reported T2DM.

### Statistical Methods

There were 51 464 SMHS participants who were free of T2DM and/or glycosuria and cardiovascular disease at baseline. Differences in socio-demographic characteristics and other risk factors by diabetes status were evaluated using a t-test for continuous variables and a chi-square test for categorical variables. Person-years for each participant were calculated as the interval between

**Table 1.** Demographic characteristics of participants by T2DM status.

|                                                           | All participants   | Type 2 Diabetes Mellitus Status |                    | P value |
|-----------------------------------------------------------|--------------------|---------------------------------|--------------------|---------|
|                                                           |                    | Controls                        | Cases              |         |
|                                                           | N = 51,464         | N = 50,160                      | N = 1,304          |         |
| <b>Age</b> (mean $\pm$ SD, years)                         | 54.1 $\pm$ 9.3     | 54.1 $\pm$ 9.3                  | 55.7 $\pm$ 9.3     | <0.0001 |
| <b>BMI</b> (mean $\pm$ SD, Kg/m <sup>2</sup> )            | 23.6 $\pm$ 3.1     | 23.5 $\pm$ 3.0                  | 25.8 $\pm$ 2.9     | <0.0001 |
| BMI<25 (%)                                                | 68.5               | 69.3                            | 39.0               | <0.0001 |
| Overweight (25 $\leq$ BMI<30; %)                          | 29.3               | 28.6                            | 53.2               |         |
| Obese (BMI $\geq$ 30; %)                                  | 2.3                | 2.1                             | 7.8                |         |
| <b>WHR</b> (mean $\pm$ SD)                                | 0.90 $\pm$ 0.06    | 0.90 $\pm$ 0.06                 | 0.93 $\pm$ 0.05    | <0.0001 |
| <b>Family History of Diabetes</b> (%)                     | 16.5               | 16.2                            | 27.1               | <0.0001 |
| <b>Hypertension</b> (%)                                   | 24.5               | 24.0                            | 43.6               | <0.0001 |
| <b>Education</b> (%)                                      |                    |                                 |                    | 0.03    |
| None/Elementary                                           | 5.6                | 5.5                             | 6.3                |         |
| Middle school                                             | 33.7               | 33.7                            | 36.8               |         |
| High school                                               | 37.5               | 37.6                            | 34.3               |         |
| College and above                                         | 23.2               | 23.2                            | 22.6               |         |
| <b>Income</b> (%)                                         |                    |                                 |                    | 0.40    |
| <500                                                      | 13.2               | 13.2                            | 13.1               |         |
| 500–999                                                   | 41.6               | 41.8                            | 39.7               |         |
| 1,000–1,999                                               | 35.2               | 35.1                            | 37.3               |         |
| >1,999                                                    | 9.8                | 9.8                             | 9.9                |         |
| <b>Occupation</b> (%)                                     |                    |                                 |                    | 0.15    |
| Professional                                              | 25.3               | 25.3                            | 26.5               |         |
| Clerical                                                  | 22.0               | 22.0                            | 23.5               |         |
| Manual laborers                                           | 52.7               | 52.8                            | 50.0               |         |
| <b>Currently Working</b> (at baseline; %)                 | 65.9               | 66.0                            | 61.9               | 0.002   |
| <b>Energy Intake</b> (Kcal/day)                           | 1927.4 $\pm$ 484.8 | 1926.9 $\pm$ 484.3              | 1947.5 $\pm$ 500.8 | 0.13    |
| <b>LPA Participation</b> (%)                              | 32.9               | 32.9                            | 32.8               | 0.97    |
| <b>Total Physical Activity</b> (mean $\pm$ SD,METs-h/y d) | 8.5 $\pm$ 4.9      | 8.5 $\pm$ 4.8                   | 8.1 $\pm$ 5.0      | 0.02    |
| <b>Smoking status</b> (%)                                 |                    |                                 |                    | 0.03    |
| Never                                                     | 29.1               | 29.1                            | 30.8               |         |
| Ex-smoker                                                 | 9.1                | 9.1                             | 10.7               |         |
| Current smoker                                            | 61.8               | 61.8                            | 58.5               |         |
| <b>Drinking status</b> (%)                                |                    |                                 |                    | 0.001   |
| Never                                                     | 66.0               | 65.9                            | 68.5               |         |
| Ex-drinker                                                | 3.6                | 3.5                             | 4.8                |         |
| Current drinker                                           | 30.5               | 30.6                            | 26.7               |         |

T-tests were used for continuous variables; chi-square tests were used for categorical variables.  
doi:10.1371/journal.pone.0077919.t001

baseline to diagnosis of T2DM, death, or completion of the latest follow-up interview. Cox proportional hazard models were used to estimate associations between physical activity level, smoking, alcohol consumption, and incidence of T2DM. We conducted the analyses using two models. Covariates in model 1 included: age at interview, total energy intake, total physical activity (MET hours/day), smoking status (never, ex-smoker, or current smoker), alcohol consumption status (never, ex-drinker, or current drinker), education level, occupation, income level, hypertension, and family history of diabetes. In model 2, analyses were conducted with further adjustment for BMI and WHR. Tests for linear trend were performed by entering the categorical variables as continuous parameters in the models. We also investigated a potential

interaction between BMI and smoking and the risk of T2DM. The log-likelihood ratio test was used to test the interaction effect of BMI and smoking on T2DM risk. All analyses were performed using SAS software, version 9.2 (SAS Institute, Inc., Cary, North Carolina), and all tests of statistical significance were based on *P* values of <0.05 (two-sided) probability.

## Results

After an average of 5.4 years of follow-up (276 929 person-years), we identified a total of 1304 self-reported T2DM cases; 1227 met our criteria for “confirmed” cases. The incidence rate of T2DM in this sample population was 4.7/1000 person-years.

**Table 2.** Associations between types of physical activity and T2DM risk.

|                          | No. of diabetes cases | HR*              | 95%CI     | HR**             | 95%CI     |
|--------------------------|-----------------------|------------------|-----------|------------------|-----------|
| <b>Total METs</b>        |                       |                  |           |                  |           |
| Q1 (<4.3)                | 307                   | 1.00             |           | 1.00             |           |
| Q2 (4.3–<6.5)            | 272                   | 0.84             | 0.72–0.99 | 0.92             | 0.78–1.08 |
| Q3 (6.5–<8.9)            | 242                   | 0.72             | 0.61–0.85 | 0.80             | 0.68–0.95 |
| Q4 (8.9–<12.1)           | 233                   | 0.66             | 0.55–0.78 | 0.74             | 0.62–0.88 |
| Q5 ( $\geq$ 12.1)        | 250                   | 0.65             | 0.54–0.77 | 0.73             | 0.61–0.87 |
|                          |                       | P trend<0.0001   |           | P trend<0.0001   |           |
| <b>LPA participation</b> |                       |                  |           |                  |           |
| None                     | 876                   | 1.00             |           |                  |           |
| Yes                      | 428                   | 0.85             | 0.75–0.96 | 0.86             | 0.76–0.98 |
| <b>LPA METs</b>          |                       |                  |           |                  |           |
| None                     | 876                   | 1.00             |           | 1.00             |           |
| Low (<1.2)               | 117                   | 0.79             | 0.65–0.96 | 0.80             | 0.65–0.97 |
| Medium (1.2–3.0)         | 137                   | 0.87             | 0.72–1.04 | 0.89             | 0.74–1.07 |
| High ( $\geq$ 3.0)       | 174                   | 0.89             | 0.75–1.07 | 0.91             | 0.76–1.08 |
|                          |                       | P trend = 0.0763 |           | P trend = 0.1195 |           |
| <b>DPA METs</b>          |                       |                  |           |                  |           |
| Q1 (<3.3)                | 296                   | 1.00             |           | 1.00             |           |
| Q2 (3.3–<5.03)           | 253                   | 0.83             | 0.70–0.98 | 0.88             | 0.74–1.04 |
| Q3 (5.03–<7.0)           | 257                   | 0.82             | 0.69–0.97 | 0.88             | 0.74–1.04 |
| Q4 (7.0–<9.8)            | 251                   | 0.77             | 0.65–0.91 | 0.85             | 0.72–1.01 |
| Q5 ( $\geq$ 9.8)         | 247                   | 0.69             | 0.58–0.83 | 0.75             | 0.63–0.90 |
|                          |                       | P trend <0.0001  |           | P trend = 0.0033 |           |
| <b>CPA METs***</b>       |                       |                  |           |                  |           |
| Low (<1.1)               | 427                   | 1.00             |           | 1.00             |           |
| Medium (1.1–2.67)        | 219                   | 0.86             | 0.73–1.01 | 0.93             | 0.79–1.10 |
| High ( $\geq$ 2.67)      | 161                   | 0.66             | 0.55–0.79 | 0.74             | 0.62–0.89 |
|                          |                       | P trend <0.0001  |           | P trend = 0.0022 |           |

\*Model 1: Adjusted for age at interview, energy intake, smoking, alcohol consumption, education level, occupation, income level, hypertension, and family history of diabetes.

\*\*Model 2: As above plus BMI and WHR.

\*\*\*Analysis restricted to employed participants.

doi:10.1371/journal.pone.0077919.t002

Baseline demographic and other characteristics of the study participants are present in Table 1. A total of 61.8% participants were current smokers and 30.5% were current regular alcohol drinkers. Among current drinkers, 73.4% reported drinking rice wine, 52.9% reported drinking beer, 24.8% reported drinking liquor, and 6.8% reported drinking grape wine regularly (data not shown in tables). A total of 16 916 (32.9%) men reported participation in exercise/sports-related physical activity during leisure time. A total of 71.2% of participants who were working at baseline reported commuting to work by bicycling or walking (data not shown in tables). Participants with T2DM tended to be older and less educated and were more likely to have a higher BMI and WHR. They were also more likely to be less physically active and to have a diagnosis of hypertension and a family history of diabetes. T2DM cases did not differ from the rest of the cohort in income or longest occupation held.

Table 2 presents associations between different types of physical activity and risk of T2DM. We found that total physical activity in METs was associated with reduced risk of T2DM. HRs across

quintiles of total METs were 1.00, 0.84, 0.72, 0.66, and 0.65 ( $P$ -trend <0.0001) in multivariate-adjusted model 1. We found an inverse association between LPA participation and risk of T2DM (HR = 0.85, 95%CI: 0.75–0.96). LPA METs did not appear to be associated with risk of T2DM in this population. DPA was strongly associated with reduced risk of T2DM, HRs for the lowest to highest quintiles were 1.00, 0.83, 0.82, 0.77, and 0.69 ( $P$ -trend <0.0001) in multivariate-adjusted model 1. CPA was categorized into 3 groups: low, medium, and high according to the MET levels. The HRs were 1.00, 0.86, and 0.66 ( $P$ -trend <0.0001). The association between physical activity and T2DM was unchanged when further adjustments for BMI and WHR were made (model 2).

Smoking more than 20 cigarettes per day and a smoking duration of  $\geq$ 40 pack-years were associated with increased risk of T2DM (HR = 1.41, 95%CI: 1.13–1.77 for smoking >20 cigarettes/day; HR = 1.39, 95%CI: 1.13–1.71 for  $\geq$ 40 pack-years of smoking). The associations were still significant after further adjustment for BMI and WHR (Table 3).

**Table 3.** Associations between cigarette smoking and T2DM risk.

|                                    | No. of diabetes cases | HR*  | 95%CI     | HR** | 95%CI     |
|------------------------------------|-----------------------|------|-----------|------|-----------|
| <b>Smoking status</b>              |                       |      |           |      |           |
| Non-smoker                         | 402                   | 1.00 |           | 1.00 |           |
| Ex-smoker                          | 139                   | 1.07 | 0.88–1.30 | 0.97 | 0.80–1.18 |
| Current smokers                    | 763                   | 1.06 | 0.93–1.21 | 1.06 | 0.92–1.21 |
| <b>Number of cigarettes smoked</b> |                       |      |           |      |           |
| Non-smoker                         | 402                   | 1.00 |           | 1.00 |           |
| Ex-smoker                          | 139                   | 1.07 | 0.88–1.30 | 0.97 | 0.80–1.18 |
| ≤10 cigarettes                     | 251                   | 0.97 | 0.82–1.14 | 0.99 | 0.84–1.17 |
| 11–20 cigarettes                   | 405                   | 1.07 | 0.92–1.25 | 1.07 | 0.92–1.24 |
| >20 cigarettes                     | 107                   | 1.41 | 1.13–1.77 | 1.25 | 1.00–1.56 |
| <b>Pack-years</b>                  |                       |      |           |      |           |
| Never smoker                       | 402                   | 1.00 |           | 1.00 |           |
| Ex-smoker                          | 139                   | 1.08 | 0.88–1.31 | 0.97 | 0.80–1.18 |
| <20                                | 303                   | 0.98 | 0.84–1.15 | 1.01 | 0.86–1.18 |
| 20–<40                             | 335                   | 1.03 | 0.88–1.20 | 1.02 | 0.87–1.20 |
| ≥40                                | 125                   | 1.39 | 1.13–1.71 | 1.28 | 1.04–1.57 |

\*Model 1: Adjusted for age, energy intake, total physical activity METs, alcohol consumption, education level, occupation, income level, hypertension, and family history of diabetes.

\*\*Model 2: As above plus BMI and WHR.

doi:10.1371/journal.pone.0077919.t003

We conducted an interaction test between smoking and BMI and the risk of T2DM (data not shown in tables). We did not observe an interaction between the number of cigarettes smoked per day and BMI ( $P=0.059$ ) nor between pack-years and BMI ( $P=0.1159$ ).

Moderate alcohol consumption (1–3 drinks/day) was associated with reduced risk of T2DM (HR = 0.81, 95%CI: 0.68–0.96) in model 1, whereas occasional (light) and heavy alcohol consumption were not associated with risk of T2DM in this population. The inverse association was mainly observed among wine drinkers. There were no significant associations between beer or liquor consumption and risk of T2DM. Results were similar for model 2 (Table 4).

## Discussion

In this prospective cohort study of Chinese men, we found that physical activity was associated with lower risk of T2DM, consistent with the findings of many previous epidemiological investigations of Western populations [14–18]. The biological mechanisms underlying this protective effect have been attributed to the ability of physical activity to promote glucose metabolism, control body fatness, and improve insulin sensitivity [19]. While the association between LPA and T2DM is well documented, studies on associations between other types of physical activity and T2DM are scarce. A study of a middle-aged Pakistani population that found stair climbing was inversely associated with the risk of T2DM, whereas household activities and walking were unrelated to risk [20]. A study conducted in Finland showed that CPA reduced the risk of T2DM among men in analyses adjusted for age and study year ( $P$ -trend = 0.036), although the association disappeared after multivariate-adjustment ( $P$ -trend = 0.501) [21]. Other studies have evaluated only the combined effect of LPA and other types of physical activity on incidence of T2DM [16,22].

The physical activity questionnaire in our study was specifically designed to assess a wide range of activities; thus, we were able to investigate associations between different types of physical activity and incidence of T2DM. As expected, the combination of all three types of physical activity had an inverse, dose-response relationship with T2DM. Moreover, we found that CPA and DPA also reduced the risk of T2DM in this population. The lifestyle characteristics of Chinese men differ from those of men in Western countries. In developed, Western countries, people most often commute via automobile and rarely walk or bicycle to work, but have high participation in exercise/sports. In our study population, participants' regular LPA involvement was low (32.9%). Our study results suggest that physical activity related to daily living and commuting was as effective as leisure-time exercise/sports-related physical activity in reducing the risk of T2DM. We found similar results in the Shanghai Women's Health Study, the sister study of the SMHS [23].

Smoking is a major cardiovascular risk factor and the leading cause of avoidable death worldwide [24]. After decades of studies, epidemiological evidence has firmly linked cigarette smoking with T2DM risk [25], although most studies have been conducted in Western populations. China is the largest consumer and producer of tobacco in the world. In 2010, there were 301 million smokers in China, most of whom are men (only 2.4% adult women in China smoke) [26,27]. In our study, 61.8% of men were current smokers, and the smoking rate peaked between age 40 and 60 years (70.7%, data not shown in tables). Of current smokers, 10.6% smoked more than 1 pack of cigarettes a day, and the average number of cigarettes smoked per day was 16. The average number of pack-years smoked was 24. We found that smoking more than 1 pack of cigarettes per day increased the risk of T2DM by 24%, and smoking more than 40 pack-years increased the risk by 28%. The association between smoking and T2DM may be confounded or modified by BMI. Indeed, a Japanese study found

**Table 4.** Associations between alcohol consumption and T2DM risk\*.

|                                 | No. of diabetes cases | HR** | 95% CI    | HR*** | 95%CI     |
|---------------------------------|-----------------------|------|-----------|-------|-----------|
| <b>Alcohol consumption</b>      |                       |      |           |       |           |
| Non-drinker                     | 893                   | 1.00 |           | 1.00  |           |
| Occasional/light (<1 drink/day) | 74                    | 0.88 | 0.69–1.11 | 0.88  | 0.70–1.12 |
| Moderate (1–<3 drinks/day)      | 172                   | 0.81 | 0.68–0.96 | 0.80  | 0.67–0.94 |
| Heavy (≥3 drinks/day)           | 102                   | 0.98 | 0.79–1.21 | 0.91  | 0.74–1.13 |
| <b>Wine</b>                     |                       |      |           |       |           |
| None                            | 978                   | 1.00 |           | 1.00  |           |
| <1 drink/day                    | 116                   | 0.81 | 0.67–0.99 | 0.82  | 0.67–0.99 |
| 1–<3 drinks/day                 | 108                   | 0.82 | 0.67–1.01 | 0.80  | 0.65–0.97 |
| ≥3 drinks/day                   | 39                    | 1.02 | 0.74–1.41 | 0.93  | 0.67–1.29 |
| <b>Beer</b>                     |                       |      |           |       |           |
| None                            | 1054                  | 1.00 |           | 1.00  |           |
| <1 drink/day                    | 146                   | 0.95 | 0.80–1.14 | 0.98  | 0.82–1.16 |
| ≥1 drink/day                    | 41                    | 0.94 | 0.68–1.29 | 0.95  | 0.69–1.31 |
| <b>Liquor</b>                   |                       |      |           |       |           |
| None                            | 1144                  | 1.00 |           | 1.00  |           |
| <1 drink/day                    | 25                    | 1.07 | 0.72–1.59 | 1.07  | 0.72–1.59 |
| ≥1 drink/day                    | 72                    | 0.98 | 0.76–1.25 | 0.93  | 0.73–1.19 |

\*Ex-drinkers were excluded from analysis.

\*\*Model 1: Adjusted for age, energy intake, physical activity METs, smoking, education level, occupation, income level, hypertension, and family history of diabetes.

\*\*\*Model 2: As above plus BMI and WHR.

doi:10.1371/journal.pone.0077919.t004

that heavy smoking increased the risk for T2DM among obese men, but light smoking reduced risk among lean men [28]. Other studies have shown that smokers have lower body weight compared with non-smokers, and the number of cigarettes smoked has been inversely associated with BMI [29,30]. We conducted an interaction test between smoking and BMI but found no interaction effects between the number of cigarettes smoked per day and BMI ( $P=0.059$ ) nor between pack-years and BMI ( $P=0.1159$ ).

The association between alcohol consumption and incidence of T2DM is less clear. Some studies have shown alcohol to be positively associated with the incidence of T2DM [31,32], whereas other studies have reported a null association [33,34] and some have reported a U-shaped or J-shaped relationship between alcohol consumption and the risk of T2DM [35,36]. In our study, neither occasional, light, nor heavy alcohol consumption was associated with T2DM. However, moderate alcohol intake (1–3 drinks/day) was inversely related to risk of T2DM. This finding is consistent with the effect of moderate alcohol consumption on improving insulin sensitivity [37–39]. While the inconsistent results in the literature on alcohol consumption and T2DM may be related to the amount of alcohol consumed, differences in the types of alcoholic beverages commonly consumed in different populations may also play a role. In our study population, about three-fourths of drinkers reported having consumed rice wine, which is an alcoholic beverage brewed from grains and is commonly consumed in China, but rare in Western countries. The number of participants having more than 3 drinks/day of beer or liquor in our population was low, so we categorized beer and liquor consumption into 3 groups: none, <1 drink/day, and ≥1 drinks/day. This level of beer and liquor intake was not associated with T2DM, despite other studies having linked consumption of beer

and other types of alcoholic beverages to increased risk of T2DM [40,41]. More studies are needed to investigate the association between alcohol consumption and T2DM by types of alcohol and the amount consumed.

Our study is based on a large population-based cohort study with high quality exposure data and high recruitment and follow up rates, which minimized selection bias and measurement errors. Extensive information on covariates allowed for us to fully adjust for many socio-demographic factors and other lifestyle cofounders. The major concern for our study is its reliance on self-reported T2DM, since undiagnosed T2DM cases could have been missed. If a healthy lifestyle is related to health consciousness and more frequent physical check-ups, as has been documented in other populations [42,43], the associations observed in our study could be underestimated. In addition, our study included only middle age men; thus, our results may not be generalizable to women.

In conclusion, we comprehensively evaluated associations between physical activity, smoking, and alcohol consumption and incidence of T2DM in a large population of Chinese men. We found that physical activity and moderate alcohol intake were associated with decreased risk of T2DM, whereas smoking increased risk. Because these lifestyle factors are modifiable, they should receive the highest priority in program development for T2DM control and prevention.

## Acknowledgments

The authors thank the participants and staff members of the SMHS for their important contributions. The authors would also like to thank Ms. Bethanie Rammer and Mrs. Jacqueline Stern for their assistance in editing and preparing the manuscript.

## Author Contributions

Conceived and designed the experiments: WZ XOS. Performed the experiments: HL QL YBX. Analyzed the data: LS HC. Wrote the paper:

LS. Provided critical review of the manuscript: RV YBX HL QL WZ XOS.

## References

- Pan XR, Yang WY, Li GW, Liu J (1997) Prevalence of diabetes and its risk factors in China, 1994. National Diabetes Prevention and Control Cooperative Group. *Diabetes Care* 20: 1664–1669.
- Narayan KM, Echouffo-Tcheugui JB, Mohan V, Ali MK (2012) Analysis & commentary: Global prevention and control of type 2 diabetes will require paradigm shifts in policies within and among countries. *Health Aff (Millwood)* 31: 84–92. doi:10.1377/hlthaff.2011.1040 [doi].
- Narayan KM, Ali MK, Koplan JP (2010) Global noncommunicable diseases—where worlds meet. *N Engl J Med* 363: 1196–1198. doi:10.1056/NEJMp1002024 [doi].
- Zimmet P, Alberti KG, Shaw J (2001) Global and societal implications of the diabetes epidemic. *Nature* 414: 782–7.
- Yang W, Lu J, Weng J, Jia W, Ji L, et al (2010) Prevalence of diabetes among men and women in China. *N Engl J Med* 362: 1090–1101. doi:10.1056/NEJMoa0908292 [doi].
- Esposito K, Ciotola M, Maiorino MI, Giugliano D (2008) Lifestyle approach for type 2 diabetes and metabolic syndrome. *Curr Atheroscler Rep* 10: 523–528.
- Villegas R, Xiang YB, Yang G, Cai Q, Fazio S, et al (2009) Prevalence and determinants of metabolic syndrome according to three definitions in middle-aged Chinese men. *Metab Syndr Relat Disord* 7: 37–45. doi:10.1089/met.2008.0042 [doi].
- Cai H, Zheng W, Xiang YB, Xu WH, Yang G, et al (2007) Dietary patterns and their correlates among middle-aged and elderly Chinese men: a report from the Shanghai Men's Health Study. *Br J Nutr* 98: 1006–1013. doi:10.1017/S0007114507750900 [doi].
- Villegas R, Yang G, Liu D, Xiang YB, Cai H, et al (2007) Validity and reproducibility of the food-frequency questionnaire used in the Shanghai men's health study. *Br J Nutr* 97: 993–1000. doi:10.1017/S0007114507669189 [doi].
- Jurj AL, Wen W, Xiang YB, Matthews CE, Liu D, et al (2007) Reproducibility and validity of the Shanghai Men's Health Study physical activity questionnaire. *Am J Epidemiol* 165: 1124–1133. doi:10.1093/aje/kwk119 [doi].
- Ainsworth BE, Haskell WL, Whitt MC, Irwin ML, Swartz AM, et al (2000) Compendium of physical activities: an update of activity codes and MET intensities. *Med Sci Sports Exerc* 32: S498–S504.
- Shu XO, Hatch MC, Mills J, Clemens J, Susser M (1995) Maternal smoking, alcohol drinking, caffeine consumption, and fetal growth: results from a prospective study. *Epidemiology* 6: 115–120.
- Shu XO, Yang G, Jin F, Liu D, Kushi L, et al (2004) Validity and reproducibility of the food frequency questionnaire used in the Shanghai Women's Health Study. *Eur J Clin Nutr* 58: 17–23. doi:10.1038/sj.ejcn.1601738 [doi].
- Helmrich SP, Ragland DR, Leung RW, Paffenbarger RS, Jr. (1991) Physical activity and reduced occurrence of non-insulin-dependent diabetes mellitus. *N Engl J Med* 325: 147–152. doi:10.1056/NEJM199107183250302 [doi].
- Manson JE, Nathan DM, Krolewski AS, Stampfer MJ, Willett WC, et al (1992) A prospective study of exercise and incidence of diabetes among US male physicians. *JAMA* 268: 63–67.
- Burchfiel CM, Sharp DS, Curb JD, Rodriguez BL, Hwang LJ, et al (1995) Physical activity and incidence of diabetes: the Honolulu Heart Program. *Am J Epidemiol* 141: 360–368.
- Wei M, Schwertner HA, Blair SN (2000) The association between physical activity, physical fitness, and type 2 diabetes mellitus. *Compr Ther* 26: 176–182.
- Hu G, Lakka TA, Barengo NC, Tuomilehto J (2005) Physical activity, physical fitness, and risk of type 2 diabetes mellitus. *Metab Syndr Relat Disord* 3: 35–44. doi:10.1089/met.2005.3.35 [doi].
- Goodyear LJ, Kahn BB (1998) Exercise, glucose transport, and insulin sensitivity. *Annu Rev Med* 49: 235–261. doi:10.1146/annurev.med.49.1.235 [doi].
- Ansari RM (2009) Effect of physical activity and obesity on type 2 diabetes in a middle-aged population. *J Environ Public Health* 2009: 195285. doi:10.1155/2009/195285 [doi].
- Hu G, Qiao Q, Silventoinen K, Eriksson JG, Jousilahti P, et al (2003) Occupational, commuting, and leisure-time physical activity in relation to risk for Type 2 diabetes in middle-aged Finnish men and women. *Diabetologia* 46: 322–329. doi:10.1007/s00125-003-1031-x [doi].
- Wannamethee SG, Shaper AG, Alberti KG (2000) Physical activity, metabolic factors, and the incidence of coronary heart disease and type 2 diabetes. *Arch Intern Med* 160: 2108–2116. doi:10.1093/ajph.100.10.1664 [doi].
- Villegas R, Shu XO, Li H, Yang G, Matthews CE, et al (2006) Physical activity and the incidence of type 2 diabetes in the Shanghai women's health study. *Int J Epidemiol* 35: 1553–1562. doi:10.1093/ije/dyl209 [doi].
- (2005) Annual smoking-attributable mortality, years of potential life lost, and productivity losses—United States, 1997–2001. *MMWR Morb Mortal Wkly Rep* 54: 625–628. doi:10.1093/mmwr/54.10.625a1 [doi].
- Willi C, Bodenmann P, Ghali WA, Faris PD, Cornuz J (2007) Active smoking and the risk of type 2 diabetes: a systematic review and meta-analysis. *JAMA* 298: 2654–2664. doi:10.1001/jama.298.22.2654 [doi].
- Yang GH (2010) Monitoring epidemic of tobacco use, promote tobacco control. *Biomed Environ Sci* 23: 420–421. doi:10.1016/S0895-3988(11)60001-9 [doi].
- Palipudi KM, Gupta PC, Sinha DN, Andes LJ, Asma S, et al (2012) Social determinants of health and tobacco use in thirteen low and middle income countries: evidence from Global Adult Tobacco Survey. *PLoS One* 7: e33466. doi:10.1371/journal.pone.0033466 [doi].
- Nagaya T, Yoshida H, Takahashi H, Kawai M (2008) Heavy smoking raises risk for type 2 diabetes mellitus in obese men; but, light smoking reduces the risk in lean men: a follow-up study in Japan. *Ann Epidemiol* 18: 113–118. doi:10.1016/j.annepidem.2007.07.107 [doi].
- Xu F, Yin XM, Wang Y (2007) The association between amount of cigarettes smoked and overweight, central obesity among Chinese adults in Nanjing, China. *Asia Pac J Clin Nutr* 16: 240–247.
- Albanes D, Jones DY, Micozzi MS, Mattson ME (1987) Associations between smoking and body weight in the US population: analysis of NHANES II. *Am J Public Health* 77: 439–444.
- Waki K, Noda M, Sasaki S, Matsumura Y, Takahashi Y, et al (2005) Alcohol consumption and other risk factors for self-reported diabetes among middle-aged Japanese: a population-based prospective study in the JPHC study cohort I. *Diabet Med* 22: 323–331. doi:10.1111/j.1464-5491.2004.01403.x [doi].
- Kao WH, Puddey IB, Boland LL, Watson RL, Brancati FL (2001) Alcohol consumption and the risk of type 2 diabetes mellitus: atherosclerosis risk in communities study. *Am J Epidemiol* 154: 748–757.
- Perry IJ, Wannamethee SG, Walker MK, Thomson AG, Whincup PH, et al (1995) Prospective study of risk factors for development of non-insulin dependent diabetes in middle aged British men. *BMJ* 310: 560–564.
- James SA, Jamjoum L, Raghunathan TE, Strogatz DS, Furth ED, et al (1998) Physical activity and NIDDM in African-Americans. *The Pitt County Study. Diabetes Care* 21: 555–562.
- Carlsson S, Hammar N, Grill V (2005) Alcohol consumption and type 2 diabetes. Meta-analysis of epidemiological studies indicates a U-shaped relationship. *Diabetologia* 48: 1051–1054. doi:10.1007/s00125-005-1768-5 [doi].
- Koppes LL, Dekker JM, Hendriks HF, Bouter LM, Heine RJ (2005) Moderate alcohol consumption lowers the risk of type 2 diabetes: a meta-analysis of prospective observational studies. *Diabetes Care* 28: 719–725. doi:10.2337/719 [doi].
- Baliunas DO, Taylor BJ, Irving H, Roerecke M, Patra J, et al (2009) Alcohol as a risk factor for type 2 diabetes: A systematic review and meta-analysis. *Diabetes Care* 32: 2123–2132. doi:10.2337/dc09-0227 [doi].
- Imhof A, Froehlich M, Brenner H, Boeing H, Pepys MB, et al (2001) Effect of alcohol consumption on systemic markers of inflammation. *Lancet* 357: 763–767. doi:10.1016/S0140-6736(00)04170-2 [doi].
- Pietraszek A, Gregersen S, Hermansen K (2010) Alcohol and type 2 diabetes. A review. *Nutr Metab Cardiovasc Dis*. doi:10.1016/j.numecd.2010.05.001 [doi].
- Cullmann M, Hilding A, Ostenson CG (2012) Alcohol consumption and risk of pre-diabetes and type 2 diabetes development in a Swedish population. *Diabet Med* 29: 441–452. doi:10.1111/j.1464-5491.2011.03450.x [doi].
- Kao WH, Puddey IB, Boland LL, Watson RL, Brancati FL (2001) Alcohol consumption and the risk of type 2 diabetes mellitus: atherosclerosis risk in communities study. *Am J Epidemiol* 154: 748–757.
- Pullen E, Nutbeam D, Moore L (1992) Demographic characteristics and health behaviours of consenters to medical examination. Results from the Welsh Health Survey. *J Epidemiol Community Health* 46: 455–459.
- Koletsis-Kounari H, Tzavara C, Tountas Y (2011) Health-related lifestyle behaviours, socio-demographic characteristics and use of dental health services in Greek adults. *Community Dent Health* 28: 47–52.
